# Supplementary material
Source: ML conference proceedings conference paper supplement (https://openreview.net/forum?id=xrbgXJomJp)

```
In [ ]: import os
import pickle
import pandas as pd
import plotly.io as pio
import plotly.graph_objects as go
from plotly.subplots import make_subplots
from trainer.utils import read_logs, smooth
pio.kaleido.scope.mathjax = None
pd.options.plotting.backend = "plotly"

In [ ]: LOG_DIR = "logs"
COLOR_MAPS = {
    "GAIL": "#2385ca",
    "AIRL": "#23cabcc",
    "SQIL": "#078f48",
    "IIQ": "#996515",
    "MIFQ-SOFT": "#d62728",
    "MIFQ-DQN": "#d66cf27",
    "MIFQ-DQN-SIGMOID": "#2385ca",
    "MIFQ-DQN-TANH": "#23cabcc",
    "MIFQ-SOFT-SIGMOID": "#078f48",
    "MIFQ-SOFT-TANH": "#996515",
    "BC": "#febf2b",
    "IQVDN": "#62a8d8",
}
ALGOS = ["BC", "IIQ", "IQVDN", "SQIL", "AIRL", "GAIL", "MIFQ-DQN", "MIFQ-SOFT", "MIFQ-DQN-SIGMOID", "MIFQ-SOFT-SIGMOID", "MIFQ-DQN-TANH", "MIFQ-SOFT-TANH"]
ALGO_NAMES = {
    "GAIL": "MAGAIL",
    "AIRL": "MAAIRL",
    "SQIL": "MASQIL",
    "IIQ": "IIQ",
    "MIFQ-SOFT": "MIFQ (Soft)",
    "MIFQ-DQN": "MIFQ (Det)",
    "MIFQ-DQN-SIGMOID": "MIFQ (Det-Sigmoid)",
    "MIFQ-DQN-TANH": "MIFQ (Det-Tanh)",
    "MIFQ-SOFT-SIGMOID": "MIFQ (Soft-Sigmoid)",
    "MIFQ-SOFT-TANH": "MIFQ (Soft-Tanh)",
    "BC": "BC",
    "Expert": "Expert",
    "IQVDN": "IQVDN",
}

In [ ]: data = read_logs(LOG_DIR)

In [ ]: os.makedirs("saved_results", exist_ok=True)
with open("saved_results/log_data.pkl", "wb") as f:
    pickle.dump(data, f)

In [ ]: all_eps = sorted([int(x.replace("eps", "")) for x in data])

In [ ]: def show_table(task="smac", eps=4096, percentage=True, std=False):
    # for eps in all_eps:
    data_df = {}
    values = data[f"eps{eps}"]
    env_names = sorted(values.keys(), key=lambda x: x.replace("5_vs_5", "05_vs_05").replace("hard", "xhard").replace("speaker", "xspeaker"))
    for env_name in env_names:
        if task != "smac":
            if not env_name.startswith(task):
                continue
        elif not any(x in env_name for x in ["protoss", "terran", "zerg"]):
            continue
        algo_values = values[env_name]
        data_df[env_name] = {}
        for algo in ALGOS:
            if algo not in algo_values:
                continue
            algo_name = ALGO_NAMES[algo]
            infos = algo_values[algo]
            if "expert_winrate" in infos and "Expert" not in data_df[env_name]:
                if std:
                    winrate = infos["expert_winrate"]
                    if percentage:
                        winrate = winrate * 100
                    prefix = "%" if percentage > 0 else ""
                    data_df[env_name]["Expert"] = f'{winrate:.1f}{prefix}'
                else:
                    data_df[env_name]["Expert"] = infos["expert_winrate"]
            if std:
                winrate = infos["winrate"]
                winrate_std = infos["winrate_std"]
                if percentage:
                    winrate = winrate * 100
                    winrate_std = winrate_std * 100
                prefix = "%" if percentage > 0 else ""
                data_df[env_name][algo_name] = f'{winrate:.1f}{prefix}±{winrate_std:.1f}{prefix}'
            else:
                data_df[env_name][algo_name] = infos["winrate"]
        if not data_df:
            return
    df = pd.DataFrame.from_dict(data_df)
    df = df.rename(index=ALGO_NAMES)
    if not std:
        df["Average"] = df.mean(axis=1)
        if percentage:
            df = df.map(lambda x: f"{100*x:.1f}%")
        else:
            df = df.map(lambda x: f"{x:.1f}")
    df = df.transpose()
    print("eps:", eps)
    display(df)

In [ ]: for eps in all_eps:
    show_table(task="smac", eps=eps, std=True)
    show_table(task="miner", eps=eps, std=True)
```

eps: 128

|                  | Expert | BC         | IIQ        | IQVDN     | MASQIL    | MAAIRL    | MAGAIL    | MIFQ (Det) | MIFQ (Soft) |
|------------------|--------|------------|------------|-----------|-----------|-----------|-----------|------------|-------------|
| protoss_5_vs_5   | 86.7%  | 17.2%±4.7% | 13.3%±2.6% | 8.6%±2.6% | 0.8%±1.4% | 0.8%±0.6% | 0.0%±0.0% | 18.0%±4.6% | 41.4%±4.6%  |
| protoss_10_vs_10 | 90.3%  | 6.2%±4.4%  | 2.3%±1.4%  | 3.1%±3.8% | 0.0%±0.0% | 0.0%±0.0% | 0.0%±0.0% | 17.2%±5.2% | 32.8%±8.4%  |
| terran_5_vs_5    | 81.7%  | 9.4%±4.9%  | 12.5%±3.1% | 9.4%±9.1% | 0.0%±0.0% | 0.0%±0.0% | 0.0%±0.0% | 25.0%±4.4% | 32.0%±3.4%  |
| terran_10_vs_10  | 81.7%  | 3.9%±3.4%  | 1.6%±2.7%  | 0.0%±0.0% | 0.0%±0.0% | 0.0%±0.0% | 0.0%±0.0% | 3.1%±2.2%  | 35.2%±7.1%  |
| zerg_5_vs_5      | 73.5%  | 7.0%±4.6%  | 10.2%±5.6% | 4.2%±4.2% | 3.9%±2.6% | 2.0%±1.2% | 3.1%±3.8% | 5.5%±2.6%  | 24.2%±4.1%  |
| zerg_10_vs_10    | 76.3%  | 10.2%±3.4% | 0.8%±1.4%  | 0.0%±0.0% | 0.0%±0.0% | 2.1%±2.4% | 0.0%±0.0% | 10.9%±1.6% | 28.9%±9.2%  |

eps: 128

|                     | Expert | BC         | IIQ        | IQVDN      | MASQIL     | MAAIRL     | MAGAIL     | MIFQ (Det) | MIFQ (Soft) |
|---------------------|--------|------------|------------|------------|------------|------------|------------|------------|-------------|
| miner_easy_2_vs_2   | 82.4%  | 28.9%±8.1% | 10.2%±3.4% | 13.3%±1.4% | 12.1%±2.0% | 14.1%±4.7% | 10.5%±3.7% | 14.1%±8.4% | 29.7%±6.4%  |
| miner_medium_2_vs_2 | 74.9%  | 23.4%±3.5% | 7.0%±3.4%  | 9.4%±3.8%  | 11.5%±3.5% | 13.3%±1.4% | 10.0%±2.4% | 11.3%±1.8% | 21.1%±8.1%  |
| miner_hard_2_vs_2   | 69.8%  | 15.6%±5.8% | 5.5%±1.4%  | 7.0%±1.4%  | 7.4%±1.6%  | 4.7%±2.7%  | 7.0%±1.5%  | 8.0%±3.2%  | 14.8%±4.1%  |

eps: 256

|                  | Expert | BC         | IIQ        | IQVDN      | MASQIL    | MAAIRL    | MAGAIL     | MIFQ (Det)  | MIFQ (Soft) |
|------------------|--------|------------|------------|------------|-----------|-----------|------------|-------------|-------------|
| protoss_5_vs_5   | 86.7%  | 12.5%±2.2% | 16.5%±2.4% | 15.1%±1.6% | 1.6%±1.6% | 7.2%±3.2% | 14.1%±4.7% | 40.6%±10.4% | 53.9%±6.8%  |
| protoss_10_vs_10 | 90.3%  | 6.2%±4.9%  | 3.9%±2.6%  | 2.9%±3.4%  | 0.0%±0.0% | 0.2%±0.3% | 15.0%±4.2% | 32.3%±2.9%  | 59.4%±8.6%  |
| terran_5_vs_5    | 81.7%  | 10.9%±4.7% | 12.5%±2.2% | 14.8%±2.6% | 0.8%±1.4% | 0.0%±0.0% | 0.0%±0.0%  | 27.3%±5.6%  | 46.1%±7.5%  |
| terran_10_vs_10  | 81.7%  | 4.7%±1.6%  | 3.9%±4.1%  | 0.0%±0.0%  | 0.0%±0.0% | 0.0%±0.0% | 0.0%±0.0%  | 0.0%±0.0%   | 43.8%±16.7% |
| zerg_5_vs_5      | 73.5%  | 8.6%±2.6%  | 11.7%±2.6% | 7.8%±6.0%  | 1.6%±1.6% | 2.9%±2.2% | 6.2%±2.2%  | 12.5%±3.8%  | 35.9%±5.2%  |
| zerg_10_vs_10    | 76.3%  | 5.5%±2.6%  | 2.3%±1.4%  | 0.0%±0.0%  | 2.3%±2.6% | 0.4%±0.4% | 3.1%±2.2%  | 12.5%±3.8%  | 41.4%±3.4%  |

eps: 256

|                     | Expert | BC          | IIQ        | IQVDN      | MASQIL     | MAAIRL     | MAGAIL     | MIFQ (Det) | MIFQ (Soft) |
|---------------------|--------|-------------|------------|------------|------------|------------|------------|------------|-------------|
| miner_easy_2_vs_2   | 82.4%  | 38.3%±6.0%  | 18.2%±6.2% | 20.3%±5.6% | 26.2%±2.8% | 14.8%±4.6% | 19.9%±2.5% | 26.6%±6.4% | 34.4%±4.4%  |
| miner_medium_2_vs_2 | 74.9%  | 21.9%±10.8% | 10.9%±6.4% | 10.2%±2.6% | 15.0%±4.0% | 12.5%±3.8% | 17.0%±3.2% | 19.9%±3.4% | 32.8%±8.4%  |
| miner_hard_2_vs_2   | 69.8%  | 20.3%±1.6%  | 6.2%±1.9%  | 7.8%±3.5%  | 13.5%±3.4% | 8.6%±4.1%  | 10.4%±2.2% | 7.8%±1.7%  | 17.2%±8.1%  |

eps: 512

|                  | Expert | BC         | IIQ        | IQVDN       | MASQIL     | MAAIRL    | MAGAIL     | MIFQ (Det)  | MIFQ (Soft) |
|------------------|--------|------------|------------|-------------|------------|-----------|------------|-------------|-------------|
| protoss_5_vs_5   | 86.7%  | 21.9%±6.6% | 17.2%±1.6% | 19.5%±8.1%  | 0.0%±0.0%  | 4.9%±1.4% | 10.2%±5.1% | 43.8%±3.1%  | 62.5%±7.7%  |
| protoss_10_vs_10 | 90.3%  | 5.5%±2.6%  | 7.0%±2.6%  | 9.1%±2.3%   | 0.0%±0.0%  | 0.0%±0.0% | 18.0%±7.1% | 35.9%±11.4% | 62.5%±9.4%  |
| terran_5_vs_5    | 81.7%  | 9.4%±4.9%  | 18.0%±3.4% | 24.2%±6.8%  | 4.7%±3.5%  | 0.8%±1.0% | 3.9%±4.1%  | 39.1%±10.0% | 59.4%±8.6%  |
| terran_10_vs_10  | 81.7%  | 7.0%±4.1%  | 7.8%±6.4%  | 18.8%±18.8% | 1.6%±1.6%  | 0.0%±0.0% | 0.0%±0.0%  | 18.0%±7.8%  | 51.6%±7.8%  |
| zerg_5_vs_5      | 73.5%  | 6.2%±5.8%  | 10.9%±3.5% | 11.7%±8.4%  | 17.2%±3.5% | 2.9%±0.3% | 15.6%±3.1% | 33.6%±7.8%  | 51.6%±9.2%  |
| zerg_10_vs_10    | 76.3%  | 5.5%±4.1%  | 3.1%±3.8%  | 0.0%±0.0%   | 0.8%±1.4%  | 0.2%±0.3% | 1.6%±1.6%  | 35.2%±4.1%  | 46.1%±4.1%  |

eps: 512

|                     | Expert | BC         | IIQ        | IQVDN      | MASQIL     | MAAIRL     | MAGAIL     | MIFQ (Det) | MIFQ (Soft) |
|---------------------|--------|------------|------------|------------|------------|------------|------------|------------|-------------|
| miner_easy_2_vs_2   | 82.4%  | 30.5%±5.1% | 13.9%±2.9% | 16.4%±6.0% | 25.8%±4.7% | 20.3%±3.5% | 25.0%±4.3% | 31.2%±3.1% | 53.9%±4.1%  |
| miner_medium_2_vs_2 | 74.9%  | 18.8%±3.1% | 14.3%±3.4% | 12.5%±2.2% | 19.5%±5.6% | 11.7%±3.4% | 20.3%±4.7% | 19.9%±3.7% | 39.1%±3.5%  |
| miner_hard_2_vs_2   | 69.8%  | 15.6%±5.8% | 6.1%±0.9%  | 5.5%±2.6%  | 14.1%±2.4% | 7.0%±2.6%  | 12.5%±1.8% | 14.1%±4.6% | 30.5%±4.1%  |

eps: 1024

|                  | Expert | BC         | IIQ        | IQVDN       | MASQIL     | MAAIRL     | MAGAIL      | MIFQ (Det) | MIFQ (Soft) |
|------------------|--------|------------|------------|-------------|------------|------------|-------------|------------|-------------|
| protoss_5_vs_5   | 86.7%  | 16.4%±8.9% | 23.4%±3.5% | 25.8%±3.4%  | 3.9%±3.4%  | 24.4%±2.5% | 43.8%±6.6%  | 49.2%±5.6% | 75.8%±2.6%  |
| protoss_10_vs_10 | 90.3%  | 4.7%±4.7%  | 16.4%±4.1% | 29.2%±9.3%  | 0.0%±0.0%  | 3.9%±3.4%  | 3.9%±6.8%   | 53.1%±5.8% | 71.1%±2.6%  |
| terran_5_vs_5    | 81.7%  | 12.5%±5.4% | 27.3%±3.4% | 33.6%±10.2% | 0.0%±0.0%  | 1.0%±0.6%  | 0.8%±1.4%   | 52.3%±2.6% | 60.9%±6.8%  |
| terran_10_vs_10  | 81.7%  | 7.8%±8.1%  | 14.1%±1.6% | 13.3%±1.4%  | 2.3%±1.4%  | 0.0%±0.0%  | 0.0%±0.0%   | 0.0%±0.0%  | 58.6%±2.6%  |
| zerg_5_vs_5      | 73.5%  | 5.5%±4.6%  | 9.4%±2.2%  | 13.5%±1.8%  | 19.5%±3.4% | 4.9%±4.4%  | 32.0%±10.5% | 38.3%±5.1% | 58.6%±3.4%  |
| zerg_10_vs_10    | 76.3%  | 9.4%±5.4%  | 11.7%±3.4% | 0.0%±0.0%   | 1.6%±1.6%  | 2.3%±2.6%  | 0.8%±1.4%   | 41.4%±5.6% | 52.3%±7.5%  |

eps: 1024

|                     | Expert | BC         | IIQ        | IQVDN      | MASQIL     | MAAIRL     | MAGAIL     | MIFQ (Det) | MIFQ (Soft) |
|---------------------|--------|------------|------------|------------|------------|------------|------------|------------|-------------|
| miner_easy_2_vs_2   | 82.4%  | 34.4%±8.6% | 17.8%±2.3% | 15.6%±5.4% | 35.9%±4.2% | 22.7%±3.4% | 31.1%±3.0% | 36.9%±3.1% | 54.7%±8.1%  |
| miner_medium_2_vs_2 | 74.9%  | 20.3%±4.7% | 13.3%±4.1% | 10.9%±4.7% | 23.2%±1.9% | 14.1%±1.6% | 22.1%±2.4% | 36.7%±8.7% | 42.2%±1.6%  |
| miner_hard_2_vs_2   | 69.8%  | 18.0%±2.6% | 9.0%±2.3%  | 8.6%±4.1%  | 19.7%±4.0% | 8.6%±2.6%  | 15.8%±5.6% | 27.3%±6.8% | 38.3%±7.1%  |

eps: 2048

|                  | Expert | BC         | IIQ        | IQVDN       | MASQIL      | MAAIRL     | MAGAIL      | MIFQ (Det)  | MIFQ (Soft) |
|------------------|--------|------------|------------|-------------|-------------|------------|-------------|-------------|-------------|
| protoss_5_vs_5   | 86.7%  | 10.2%±5.1% | 28.1%±4.9% | 28.1%±10.4% | 39.1%±10.0% | 37.3%±4.4% | 56.2%±10.6% | 65.6%±11.0% | 73.4%±5.2%  |
| protoss_10_vs_10 | 90.3%  | 2.3%±2.6%  | 16.4%±3.4% | 25.0%±5.9%  | 43.8%±10.6% | 9.4%±1.5%  | 39.8%±6.4%  | 45.3%±1.6%  | 78.1%±5.8%  |
| terran_5_vs_5    | 81.7%  | 10.2%±6.0% | 28.1%±4.4% | 36.7%±7.1%  | 8.6%±3.4%   | 7.0%±1.4%  | 28.9%±5.1%  | 55.5%±5.1%  | 56.2%±7.3%  |
| terran_10_vs_10  | 81.7%  | 5.5%±2.6%  | 24.2%±2.6% | 43.8%±11.0% | 0.0%±0.0%   | 0.0%±0.0%  | 0.0%±0.0%   | 46.9%±8.8%  | 69.5%±7.1%  |
| zerg_5_vs_5      | 73.5%  | 7.0%±4.6%  | 15.6%±3.8% | 26.3%±5.3%  | 28.1%±3.8%  | 3.9%±1.5%  | 33.6%±7.5%  | 48.1%±8.0%  | 57.0%±10.2% |
| zerg_10_vs_10    | 76.3%  | 5.5%±2.6%  | 19.5%±3.4% | 10.4%±3.6%  | 25.8%±8.1%  | 1.2%±1.3%  | 46.9%±7.3%  | 49.2%±2.6%  | 53.9%±11.8% |

eps: 2048

|                     | Expert | BC         | IIQ        | IQVDN      | MASQIL     | MAAIRL     | MAGAIL     | MIFQ (Det) | MIFQ (Soft) |
|---------------------|--------|------------|------------|------------|------------|------------|------------|------------|-------------|
| miner_easy_2_vs_2   | 82.4%  | 35.9%±3.5% | 19.5%±1.2% | 21.1%±1.4% | 43.8%±2.2% | 26.6%±1.6% | 36.7%±7.1% | 50.0%±4.9% | 64.8%±6.0%  |
| miner_medium_2_vs_2 | 74.9%  | 19.5%±7.1% | 9.8%±4.4%  | 17.2%±3.5% | 30.5%±4.6% | 21.1%±3.4% | 28.5%±2.2% | 41.4%±5.1% | 43.8%±11.5% |
| miner_hard_2_vs_2   | 69.8%  | 10.2%±3.4% | 8.6%±2.0%  | 10.2%±2.6% | 20.7%±2.6% | 14.1%±6.8% | 18.8%±3.1% | 39.8%±8.1% | 45.3%±4.7%  |

eps: 4096

|                  | Expert | BC         | IIQ        | IQVDN      | MASQIL     | MAAIRL     | MAGAIL     | MIFQ (Det) | MIFQ (Soft) | MIFQ (Det-Sigmoid) | MIFQ (Soft-Sigmoid) | MIFQ (Det-Tanh) | MIFQ (Soft-Tanh) |
|------------------|--------|------------|------------|------------|------------|------------|------------|------------|-------------|--------------------|---------------------|-----------------|------------------|
| protoss_5_vs_5   | 86.7%  | 19.5%±5.6% | 33.6%±8.9% | 39.8%±4.1% | 47.7%±2.5% | 42.6%±3.9% | 42.6%±4.6% | 64.8%±4.1% | 72.7%±10.0% | 49.2%±4.6%         | 53.1%±6.6%          | 60.9%±10.0%     | 62.5%±3.1%       |
| protoss_10_vs_10 | 90.3%  | 5.5%±1.4%  | 16.6%±0.3% | 38.3%±8.9% | 36.8%±2.8% | 19.8%±2.9% | 28.3%±2.3% | 61.7%±5.8% | 77.3%±5.6%  | 59.2%±8.2%         | 45.3%±9.2%          | 36.9%±7.2%      | 64.4%±1.1%       |
| terran_5_vs_5    | 81.7%  | 18.0%±2.6% | 19.7%±5.3% | 32.0%±6.0% | 24.6%±4.2% | 10.9%±4.5% | 10.9%±4.5% | 55.9%±0.4% | 71.9%±3.8%  | 48.4%±2.9%         | 35.2%±10.5%         | 45.1%±2.7%      | 60.6%±6.7%       |
| terran_10_vs_10  | 81.7%  | 6.2%±2.2%  | 14.1%±1.7% | 35.9%±4.7% | 0.5%±0.5%  | 2.3%±1.4%  | 1.0%±0.7%  | 53.8%±6.9% | 72.7%±3.4%  | 26.0%±2.2%         | 46.1%±9.2%          | 28.6%±2.6%      | 53.8%±6.7%       |
| zerg_5_vs_5      | 73.5%  | 10.9%±3.5% | 18.6%±1.4% | 33.6%±7.5% | 14.8%±3.1% | 5.3%±1.2%  | 18.8%±0.6% | 46.7%±5.2% | 60.9%±14.7% | 39.8%±5.1%         | 21.1%±5.1%          | 27.9%±2.2%      | 43.8%±5.7%       |
| zerg_10_vs_10    | 76.3%  | 9.4%±3.8%  | 16.4%±0.6% | 17.2%±3.5% | 27.1%±4.8% | 1.2%±1.2%  | 31.2%±3.6% | 51.0%±2.2% | 59.4%±3.1%  | 12.5%±4.9%         | 29.7%±2.7%          | 15.2%±3.9%      | 41.3%±2.2%       |

eps: 4096

|                     | Expert | BC         | IIQ        | IQVDN      | MASQIL     | MAAIRL     | MAGAIL     | MIFQ (Det) | MIFQ (Soft) | MIFQ (Det-Sigmoid) | MIFQ (Soft-Sigmoid) | MIFQ (Det-Tanh) | MIFQ (Soft-Tanh) |
|---------------------|--------|------------|------------|------------|------------|------------|------------|------------|-------------|--------------------|---------------------|-----------------|------------------|
| miner_easy_2_vs_2   | 82.4%  | 31.2%±5.8% | 21.9%±4.4% | 18.8%±3.8% | 36.7%±2.9% | 35.2%±2.6% | 34.6%±3.3% | 52.7%±0.7% | 60.2%±5.6%  | 32.0%±4.6%         | 53.1%±7.7%          | 56.4%±7.2%      | 43.1%±4.5%       |
| miner_medium_2_vs_2 | 74.9%  | 28.1%±3.8% | 9.8%±1.6%  | 14.8%±3.4% | 28.3%±1.9% | 21.1%±2.6% | 26.0%±1.5% | 43.8%±2.2% | 49.2%±5.1%  | 24.8%±2.2%         | 40.6%±5.8%          | 45.7%±10.1%     | 38.7%±12.6%      |
| miner_hard_2_vs_2   | 69.8%  | 12.5%±2.2% | 6.6%±0.7%  | 11.7%±2.6% | 19.9%±2.0% | 17.2%±6.4% | 20.9%±2.4% | 39.1%±5.2% | 39.8%±4.6%  | 21.7%±2.0%         | 25.8%±3.4%          | 34.8%±3.9%      | 32.5%±10.8%      |

```
In [ ]: for eps in all_eps:
        show_table("simple", eps=eps, percentage=False, std=True)
```

eps: 1

|                         | Expert | BC        | IIQ       | IQVDN     | MASQIL     | MAAIRL     | MAGAIL     | MIFQ (Det) | MIFQ (Soft) |
|-------------------------|--------|-----------|-----------|-----------|------------|------------|------------|------------|-------------|
| simple_reference        | -17.2  | -20.5±0.0 | -26.5±0.1 | -29.1±0.1 | -33.5±0.9  | -45.4±2.4  | -45.8±0.3  | -42.8±0.3  | -23.1±0.0   |
| simple_spread           | -10.7  | -21.7±0.0 | -30.3±0.2 | -41.6±0.4 | -44.2±0.1  | -28.9±0.6  | -31.8±1.5  | -30.4±0.1  | -30.8±0.4   |
| simple_speaker_listener | -19.7  | -28.5±0.0 | -53.8±0.4 | -37.7±0.2 | -138.9±0.4 | -127.4±0.1 | -115.6±1.6 | -50.5±0.3  | -27.6±0.0   |

eps: 2

|                         | Expert | BC        | IIQ       | IQVDN     | MASQIL     | MAAIRL     | MAGAIL     | MIFQ (Det) | MIFQ (Soft) |
|-------------------------|--------|-----------|-----------|-----------|------------|------------|------------|------------|-------------|
| simple_reference        | -17.5  | -24.1±0.2 | -28.4±0.1 | -39.0±1.2 | -49.7±0.1  | -48.6±0.1  | -43.4±0.1  | -44.6±0.6  | -22.4±0.1   |
| simple_spread           | -11.4  | -24.3±0.0 | -35.3±0.2 | -48.1±1.9 | -54.8±0.2  | -33.6±2.2  | -25.2±0.1  | -27.5±0.6  | -28.4±0.4   |
| simple_speaker_listener | -19.2  | -27.6±0.0 | -43.7±0.4 | -56.4±4.6 | -113.9±3.7 | -121.5±6.9 | -107.6±0.2 | -44.2±0.0  | -27.3±0.0   |

eps: 4

|        | Expert                  | BC    | IIQ       | IQVDN     | MASQIL    | MAAIRL     | MAGAIL     | MIFQ (Det) | MIFQ (Soft) |           |
|--------|-------------------------|-------|-----------|-----------|-----------|------------|------------|------------|-------------|-----------|
| simple | simple_reference        | -17.5 | -22.5±0.1 | -26.2±0.4 | -26.8±0.7 | -26.7±0.0  | -48.2±0.3  | -50.3±0.2  | -45.2±0.2   | -20.0±0.0 |
|        | simple_spread           | -11.4 | -23.8±0.0 | -28.5±4.8 | -34.2±1.1 | -46.9±0.2  | -28.0±0.2  | -43.5±0.2  | -25.9±0.2   | -23.1±0.4 |
|        | simple_speaker_listener | -19.2 | -29.6±0.0 | -67.3±1.3 | -40.0±1.9 | -113.1±0.6 | -134.0±0.0 | -92.5±1.2  | -125.4±0.2  | -29.9±0.0 |

eps: 8

|                         | Expert | BC        | IIQ       | IQVDN     | MASQIL     | MAAIRL     | MAGAIL    | MIFQ (Det) | MIFQ (Soft) |
|-------------------------|--------|-----------|-----------|-----------|------------|------------|-----------|------------|-------------|
| simple_reference        | -17.5  | -19.0±0.1 | -25.6±0.1 | -35.9±1.6 | -43.1±0.6  | -46.5±1.0  | -42.8±1.1 | -33.1±0.3  | -20.2±0.1   |
| simple_spread           | -11.4  | -21.7±0.0 | -27.9±0.1 | -29.3±0.2 | -47.0±1.2  | -33.2±1.9  | -28.4±0.7 | -35.8±0.1  | -53.1±0.9   |
| simple_speaker_listener | -19.2  | -32.9±0.0 | -35.9±0.1 | -38.6±0.3 | -111.1±0.2 | -134.0±0.0 | -99.4±0.5 | -59.9±0.2  | -28.9±0.1   |

eps: 16

|                         | Expert | BC        | IIQ       | IQVDN     | MASQIL     | MAAIRL     | MAGAIL     | MIFQ (Det) | MIFQ (Soft) |
|-------------------------|--------|-----------|-----------|-----------|------------|------------|------------|------------|-------------|
| simple_reference        | -17.5  | -18.2±0.1 | -20.8±0.2 | -22.7±0.2 | -32.0±0.5  | -47.8±2.1  | -45.4±0.6  | -38.9±0.2  | -18.8±0.1   |
| simple_spread           | -11.4  | -21.3±0.0 | -24.2±0.2 | -38.7±1.1 | -45.1±0.2  | -25.3±0.5  | -41.2±1.0  | -31.0±0.3  | -37.7±0.6   |
| simple_speaker_listener | -19.2  | -31.9±0.0 | -56.5±0.1 | -35.2±0.5 | -129.4±0.4 | -134.0±0.0 | -134.0±0.0 | -40.4±0.5  | -27.9±0.0   |

eps: 32

|                         | Expert | BC        | IIQ       | IQVDN     | MASQIL     | MAAIRL     | MAGAIL     | MIFQ (Det) | MIFQ (Soft) |
|-------------------------|--------|-----------|-----------|-----------|------------|------------|------------|------------|-------------|
| simple reference        | -17.5  | -18.3±0.0 | -18.7±0.2 | -21.7±0.2 | -46.0±0.2  | -30.4±1.5  | -30.7±1.3  | -32.2±0.1  | -18.6±0.1   |
| simple spread           | -11.4  | -20.6±0.0 | -27.1±0.1 | -34.7±0.5 | -34.9±0.3  | -32.1±0.7  | -33.8±0.4  | -24.8±0.2  | -54.9±0.4   |
| simple speaker listener | -19.2  | -29.0±0.0 | -32.8±0.2 | -35.9±0.1 | -104.4±0.2 | -132.5±2.1 | -134.8±0.4 | -36.8±1.0  | -28.1±0.0   |

eps: 64

|                         | Expert | BC        | IIQ       | IQVDN     | MASQIL    | MAAIRL     | MAGAIL     | MIFQ (Det) | MIFQ (Soft) |
|-------------------------|--------|-----------|-----------|-----------|-----------|------------|------------|------------|-------------|
| simple_reference        | -17.5  | -18.1±0.0 | -18.3±0.2 | -18.9±0.2 | -36.4±0.7 | -31.3±1.0  | -42.6±0.2  | -24.6±0.1  | -20.4±0.0   |
| simple_spread           | -11.4  | -20.3±0.0 | -23.0±0.1 | -23.8±0.2 | -29.9±0.2 | -29.4±0.0  | -32.7±0.1  | -23.5±0.2  | -23.7±0.2   |
| simple_speaker_listener | -19.2  | -28.4±0.0 | -30.3±0.3 | -39.8±1.1 | -69.2±1.7 | -124.6±0.3 | -117.7±0.1 | -33.4±0.0  | -26.7±0.0   |

eps: 128

|  | Expert                  | BC    | IIQ       | IQVDN     | MASQIL    | MAAIRL     | MAGAIL     | MIFQ (Det) | MIFQ (Soft) | MIFQ (Det-Sigmoid) | MIFQ (Soft-Sigmoid) | MIFQ (Det-Tanh) | MIFQ (Soft-Tanh) |           |
|--|-------------------------|-------|-----------|-----------|-----------|------------|------------|------------|-------------|--------------------|---------------------|-----------------|------------------|-----------|
|  | simple_reference        | -17.2 | -18.3±0.0 | -18.6±0.2 | -19.0±0.1 | -36.6±1.5  | -40.7±3.2  | -40.0±0.2  | -23.4±0.1   | -20.5±0.0          | -40.4±1.2           | -23.0±0.1       | -22.1±0.1        | -21.7±0.1 |
|  | simple_spread           | -10.7 | -20.5±0.0 | -23.6±0.2 | -21.6±0.2 | -23.0±0.4  | -26.5±0.3  | -24.3±0.1  | -23.2±0.1   | -24.2±0.1          | -46.4±0.1           | -24.7±0.7       | -27.8±1.1        | -26.6±1.5 |
|  | simple_speaker_listener | -19.7 | -27.5±0.0 | -29.1±0.1 | -29.5±0.5 | -104.3±5.0 | -125.5±0.7 | -78.7±4.9  | -30.8±0.1   | -26.3±0.0          | -133.4±0.1          | -28.9±0.0       | -34.7±1.0        | -28.2±0.0 |

```
In [ ]: def create_baseline_fig(data, showlegend_dict, ts_factor=0.85, extra_activation=False):
    if extra_activation:
        data = {k: v for k, v in data.items() if "MIFQ" in k or "TANH" in k or "SIGMOID" in k}
    else:
        data = {k: v for k, v in data.items() if "TANH" not in k and "SIGMOID" not in k}

    fig = go.Figure()
    is_show_expert = False
    for algo, values in data.items():
        showlegend_dict["Expert"] = showlegend_dict.get("Expert", 0) + 1
        showlegend = showlegend_dict["Expert"] <= 1
        fig.add_trace(go.Scatter(
            x=values["steps"], y=values["winrates"],
            mode='lines', showlegend=False, line_color=COLOR_MAPS[algo], opacity=0.15, line_width=1
        ))
    if not is_show_expert:
        fig.add_trace(go.Scatter(
            x=[0, max(values["steps"])], y=[values["expert_winrate"], values["expert_winrate"]],
            mode='lines', showlegend=showlegend, name="Expert", line_color="#595959", line_dash="dash", line_width=1
        ))
    is_show_expert = True
    algos = sorted(data.keys(), key=ALGOS.index)
    for algo in algos:
        showlegend_dict[algo] = showlegend_dict.get(algo, 0) + 1
        showlegend = showlegend_dict[algo] <= 1
        name = ALGO_NAMES[algo.upper()]
        if extra_activation:
            if name == "MIFQ (Det)":
                name = "MIFQ (Det-ELU)"
            elif name == "MIFQ (Soft)":
                name = "MIFQ (Soft-ELU)"
        values = data[algo]
        smooth_winrates = smooth(values["winrates"], ts_factor)
        fig.add_trace(go.Scatter(
            x=values["steps"], y=smooth_winrates,
            mode='lines', showlegend=showlegend, name=name, line_color=COLOR_MAPS[algo], line_width=2 if "ours" in name else 1.6
        ))
    fig.update_layout(template='simple_white', margin=dict(l=0, r=0, t=0, b=0, pad=0, autoexpand=True))
    fig.update_layout(height=120, width=180)
    fig.update_xaxes(minor=dict(ticklen=2))
    return fig

plotly_figs = {}
showlegend_dict = {}
for eps in reversed(all_eps):
    for env_name, values in data[f"eps{eps}"].items():
        if env_name.startswith("miner"):
            name = "miner"
        elif env_name.startswith("simple"):
            name = "simple"
        else:
            name = "smac"
        if name not in showlegend_dict:
            showlegend_dict[name] = {}
        if eps not in plotly_figs:
            plotly_figs[eps] = {}
        plotly_figs[eps][env_name] = create_baseline_fig(values, showlegend_dict[name])

In [ ]: def show_smac(eps, prefix="", save_fig=True):
    env_names = [env_name for env_name in plotly_figs[eps] if any(x in env_name for x in ["protoss", "terran", "zerg"])]
    if len(env_names) == 0:
        return
    print(f"Number of expert episodes: {eps}")
    env_names.sort(key=lambda x: x.replace("5_vs_5", "05_vs_05"))
    os.makedirs("graphs", exist_ok=True)
    fig = make_subplots(rows=1, cols=6, horizontal_spacing=0.06, vertical_spacing=0.2)
    for i, env_name in enumerate(env_names):
        plotly_fig = plotly_figs[eps][env_name]
        plotly_fig.update_xaxes(range=[2e4, 1e6], dtick=5e5, minor=dict(ticklen=3, nticks=3))
```

```

plotly_fig.update_yaxes(range=[-1e-2, 0.95], dtick=0.4, minor=dict(ticklen=3, nticks=2))
plotly_fig.update_layout(showlegend=False)
if save_fig or True:
    plotly_fig.write_image(f"graphs/{env_name}_{eps}{prefix}.pdf")
fig.add_traces(plotly_fig.data, rows=i//6+1, cols=i%6+1)
fig['layout']['f'xaxis[i+1]'].update(title=env_name)
fig['layout']['f'yaxis[i+1]'].update(showticklabels=i%6==0)
fig.update_layout(template='simple_white', margin=dict(l=4, r=4, t=4, b=4, pad=4, autoexpand=True))
fig.update_layout(height=200, width=180*7)
fig.update_xaxes(range=[2e4, 1e6], dtick=5e5, minor=dict(ticklen=3, nticks=3))
fig.update_yaxes(range=[-1e-2, 0.95], dtick=0.4, minor=dict(ticklen=3, nticks=2))
fig.update_layout(legend=dict(orientation="h", yanchor="bottom", y=1.02, xanchor="right", x=1))
fig.update_layout(autosize=False)
fig.show("svg")
return fig

```

```

In [ ]: fig = show_smac(4096)
fig.write_image(f"graphs/legend_smac.pdf")

```

Number of expert episodes: 4096

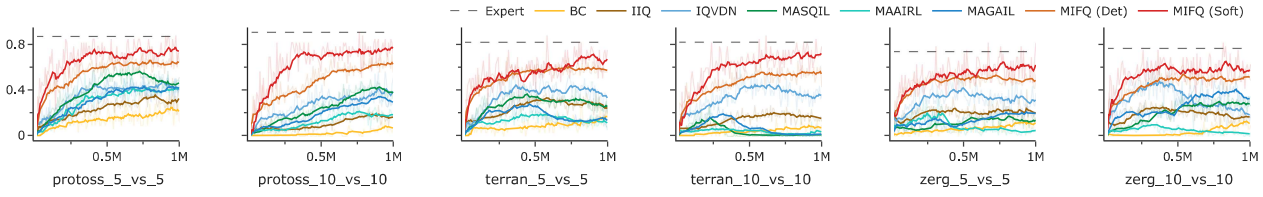

```

In [ ]: for eps in reversed(all_eps):
fig = show_smac(eps, save_fig=False)

```

Number of expert episodes: 4096

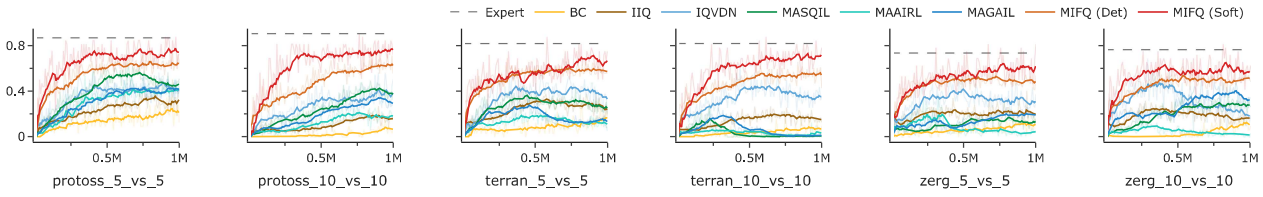

Number of expert episodes: 2048

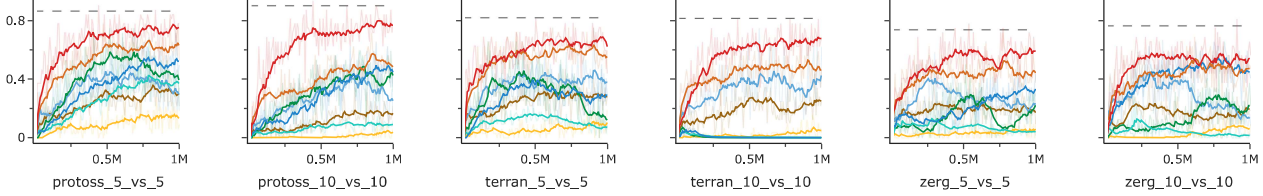

Number of expert episodes: 1024

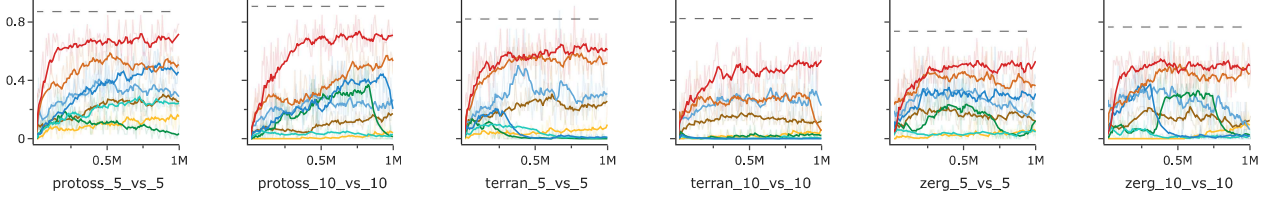

Number of expert episodes: 512

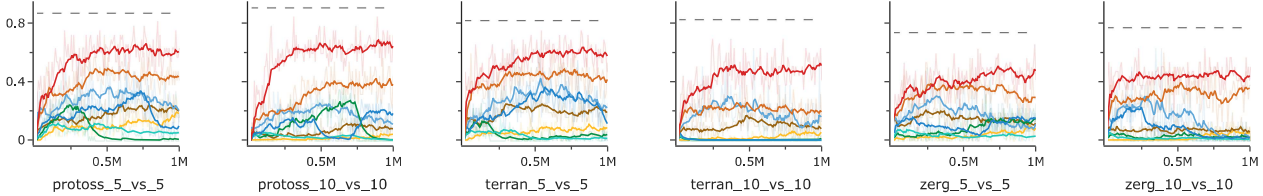

Number of expert episodes: 256

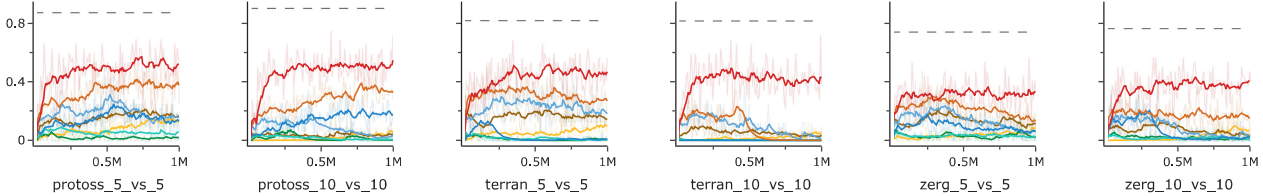

Number of expert episodes: 128

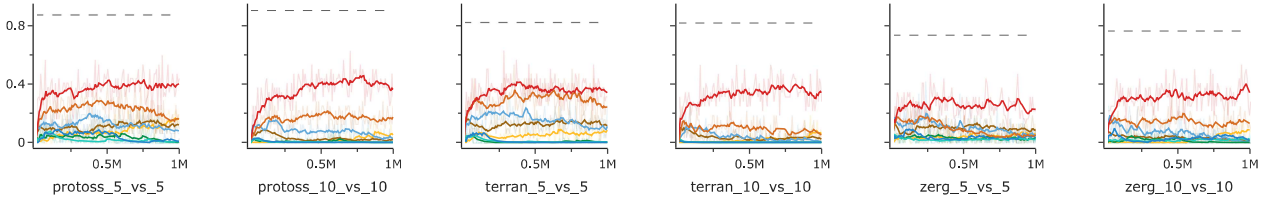

```

In [ ]: data_df = {}
for eps in all_eps:
    for env_name, item in data[f"eps({eps})"].items():
        if not any(x in env_name for x in ["protoss", "terran", "zerg"]):
            continue
        for algo, values in item.items():
            if algo not in data_df:
                data_df[algo] = {}
            if eps not in data_df[algo]:
                data_df[algo][eps] = {}
            data_df[algo][eps][env_name] = values["winrate"]
for algo in ALGOS:
    if "TANH" in algo or "SIGMOID" in algo or "BC" in algo or algo not in data_df:
        continue
    print("SMAC - algo:", ALGO_NAMES[algo])
    df = pd.DataFrame.from_dict(data_df[algo])
    fig = df.plot.box()

```



```
fig.update_layout(template='simple_white', margin=dict(l=4, r=4, t=4, b=4, pad=4, autoexpand=True))
fig.update_layout(height=150, width=180)
fig.update_layout(xaxis_title=None, yaxis_title=None)
fig.update_yaxes(range=[-4e-2, 0.79], dtick=0.3, minor=dict(ticklen=3, nticks=2))
fig.write_image(f"graphs/smac_{algo}_box.pdf")
fig.show("svg")
```

SMAC - algo: IIQ

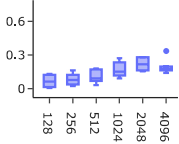

SMAC - algo: IQVDN

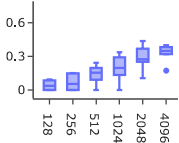

SMAC - algo: MASQIL

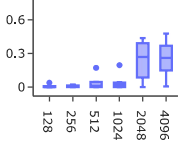

SMAC - algo: MAAIRL

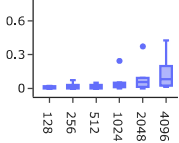

SMAC - algo: MAGAIL

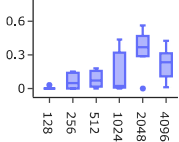

SMAC - algo: MIFQ (Det)

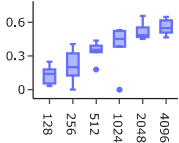

SMAC - algo: MIFQ (Soft)

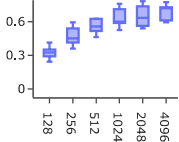

```
In [ ]: def show_miner(eps, prefix="", save_fig=True):
env_names = [env_name for env_name in plotly_figs[eps] if env_name.startswith("miner")]
if len(env_names) == 0:
return
print(f"Number of expert episodes: {eps}")
os.makedirs("graphs", exist_ok=True)
fig = make_subplots(rows=1, cols=6, horizontal_spacing=0.06, vertical_spacing=0.2)
for i, env_name in enumerate(env_names):
plotly_fig = plotly_figs[eps][env_name]
plotly_fig.update_xaxes(range=[1e2, 1e6], dtick=5e5, minor=dict(ticklen=3, nticks=3))
plotly_fig.update_yaxes(range=[-1e-2, 0.9], dtick=0.4, minor=dict(ticklen=3, nticks=2))
plotly_fig.update_layout(showlegend=False)
if save_fig or True:
plotly_fig.write_image(f"graphs/{env_name}_{eps}{prefix}.pdf")
fig.add_traces(plotly_fig.data, rows=1//6+1, cols=1%6+1)
fig['layout']['f'xaxis[i+1]'].update(title=env_name)
fig['layout']['f'yaxis[i+1]'].update(showticklabels=i%5==0)
fig.update_layout(template='simple_white', margin=dict(l=4, r=4, t=4, b=4, pad=4, autoexpand=True))
fig.update_layout(height=200, width=180*7)
fig.update_xaxes(range=[1e2, 1e6], dtick=5e5, minor=dict(ticklen=3, nticks=3))
fig.update_yaxes(range=[-1e-2, 0.9], dtick=0.4, minor=dict(ticklen=3, nticks=2))
fig.update_layout(legend=dict(orientation="h", yanchor="bottom", y=1.02, xanchor="right", x=1))
fig.update_layout(autosize=False)
fig.show("svg")
return fig
```

```
In [ ]: fig = show_miner(4096)
fig.write_image(f"graphs/legend_miner.pdf")
```

Number of expert episodes: 4096

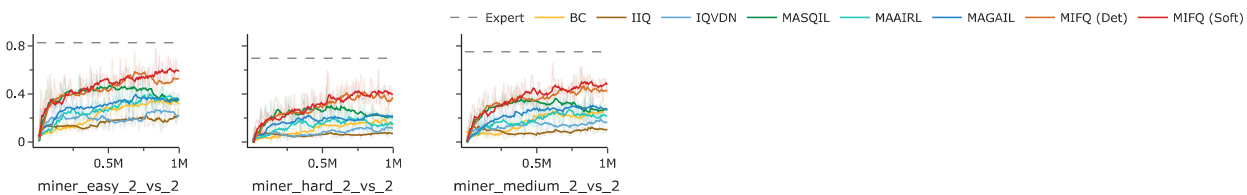

```
In [ ]: for eps in reversed(all_eps):
fig = show_miner(eps, save_fig=False)
```

Number of expert episodes: 4096

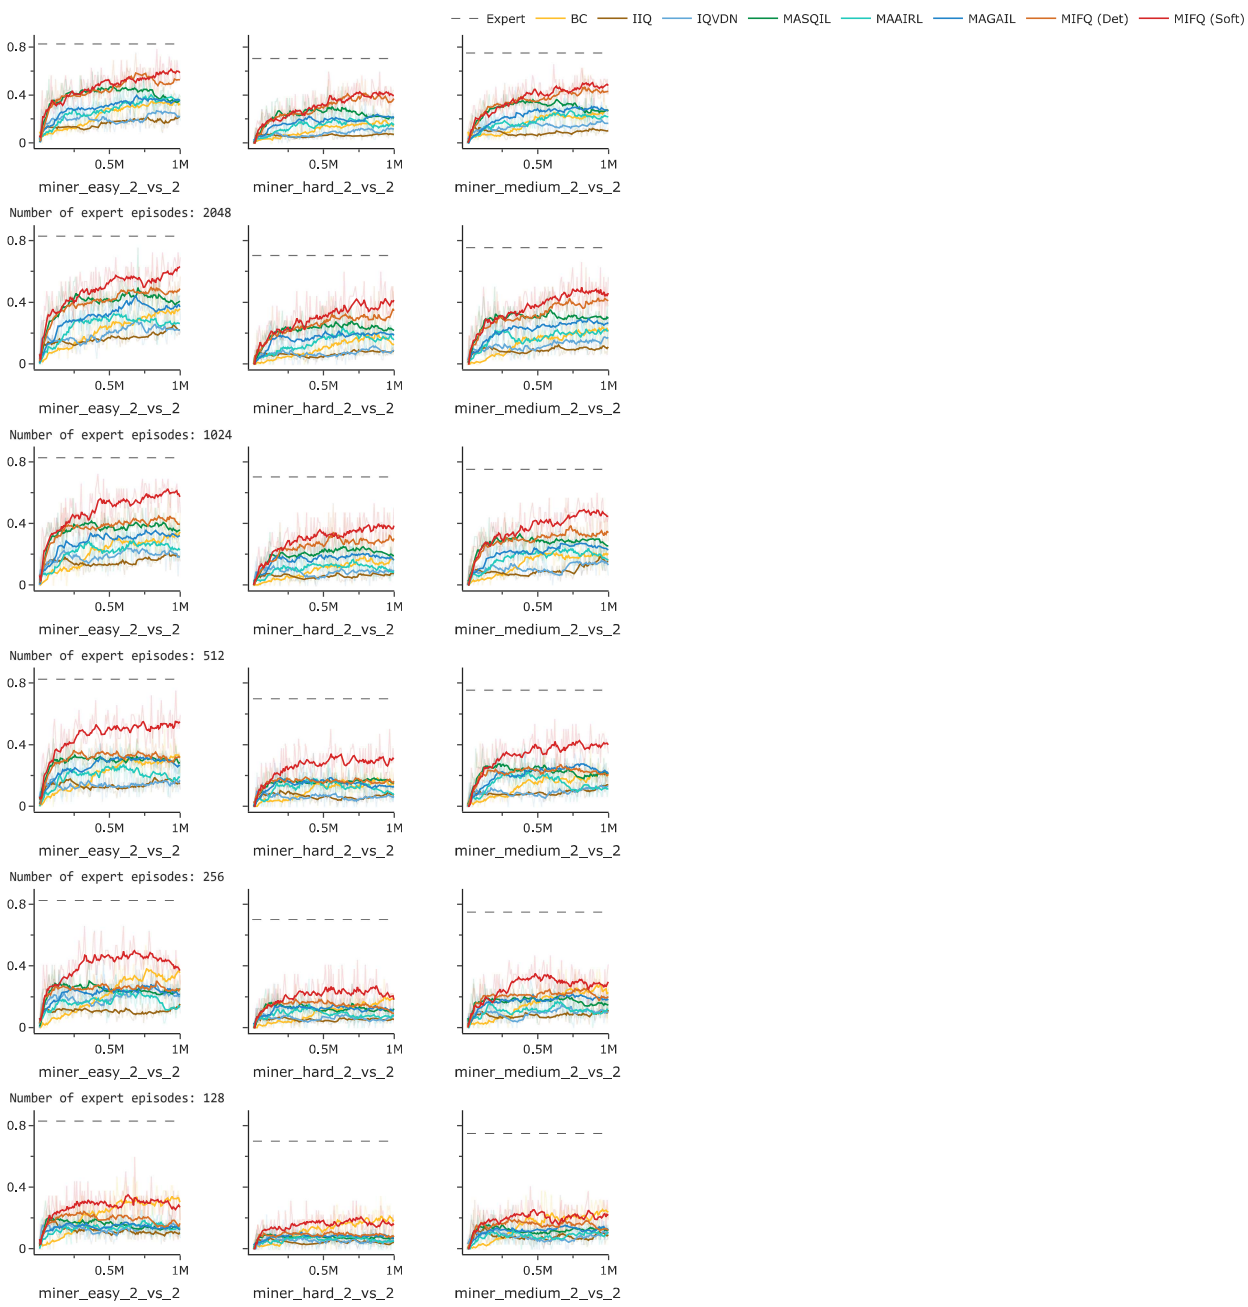

```
In [ ]: data_df = {}
for eps in all_eps:
    for env_name, item in data[f"eps{eps}"].items():
        if not env_name.startswith("miner"):
            continue
        for algo, values in item.items():
            if algo not in data_df:
                data_df[algo] = {}
            if eps not in data_df[algo]:
                data_df[algo][eps] = {}
            data_df[algo][eps][env_name] = values["winrate"]
for algo in ALGOS:
    if "TANH" in algo or "SIGMOID" in algo or "BC" in algo or algo not in data_df:
        continue
    print("Miner - algo:", ALGO_NAMES[algo])
    df = pd.DataFrame.from_dict(data_df[algo])
    fig = df.plot.box()
    fig.update_layout(template='simple_white', margin=dict(l=4, r=4, t=4, b=4, pad=4, autoexpand=True))
    fig.update_layout(height=150, width=180)
    fig.update_layout(xaxis_title=None, yaxis_title=None)
    fig.update_yaxes(range=[-4e-2, 0.69], dtick=0.2, minor=dict(ticklen=3, nticks=2))
    fig.write_image(f"graphs/miner_{algo}_box.pdf")
    fig.show("svg")
```

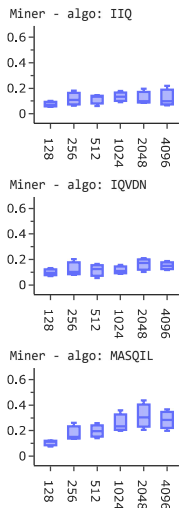

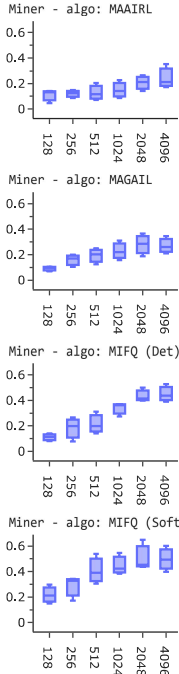

```
In [ ]: def show_mpe(eps, prefix="", save_fig=True):
env_names = [env_name for env_name in plotly_figs[eps] if env_name.startswith("simple")]
if len(env_names) == 0:
return
print(f"Number of expert episodes: {eps}")
os.makedirs("graphs", exist_ok=True)
fig = make_subplots(rows=1, cols=6, horizontal_spacing=0.06, vertical_spacing=0.2)
for i, env_name in enumerate(env_names):
plotly_fig = plotly_figs[eps][env_name]
plotly_fig.update_xaxes(range=[4e3, 1e5], dtick=5e4, minor=dict(ticklen=3, nticks=3))
# plotly_fig.update_yaxes(range=[-1e-2, 0.59], dtick=0.2, minor=dict(ticklen=3, nticks=2))
plotly_fig.update_layout(showlegend=False)
if save_fig or True:
plotly_fig.write_image(f"graphs/{env_name}_{eps}(prefix).pdf")
fig.add_traces(plotly_fig.data, rows=1//6+1, cols=1*6+1)
fig["layout"]["xaxis[i+1]"].update(title=env_name)
fig.update_layout(template="simple_white", margin=dict(l=4, r=4, b=4, pad=4, autoexpand=True))
fig.update_layout(height=200, width=180*7)
fig.update_xaxes(range=[4e3, 1e5], dtick=5e4, minor=dict(ticklen=3, nticks=3))
fig.update_layout(legend=dict(orientation="h", yanchor="bottom", y=1.02, xanchor="right", x=1))
fig.update_layout(autosize=False)
fig.show("svg")
return fig
```

```
In [ ]: fig = show_mpe(128)
fig.write_image(f"graphs/legend_mpe.pdf")
```

Number of expert episodes: 128

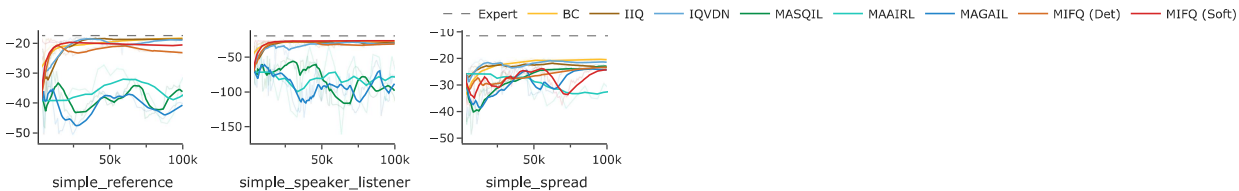

```
In [ ]: for eps in reversed(all_eps):
fig = show_mpe(eps, save_fig=False)
```

Number of expert episodes: 128

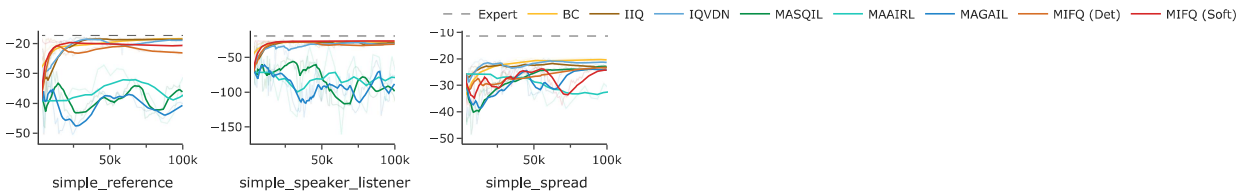

Number of expert episodes: 64

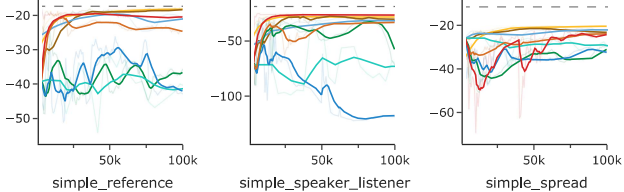

Number of expert episodes: 32

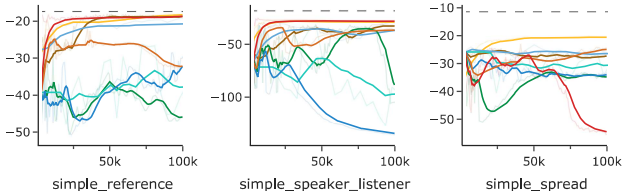

Number of expert episodes: 16

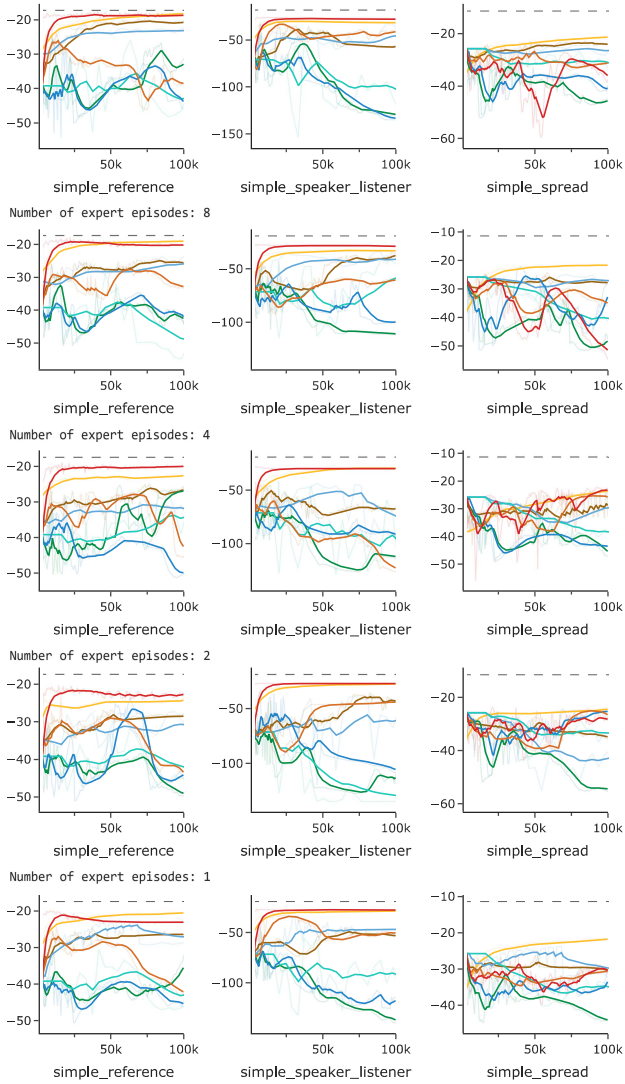

```
In [ ]: data_df = {}
for eps in all_eps:
    for env_name, item in data[f"eps={eps}"].items():
        if not env_name.startswith("simple"):
            continue
        for algo, values in item.items():
            if algo not in data_df:
                data_df[algo] = {}
            if eps not in data_df[algo]:
                data_df[algo][eps] = {}
            data_df[algo][eps][env_name] = values["winrate"]
for algo in ALGOS:
    if "TANH" in algo or "SIGMOID" in algo or "BC" in algo or algo not in data_df:
        continue
    print("SMAC - algo:", ALGO_NAMES[algo])
    df = pd.DataFrame.from_dict(data_df[algo])
    fig = df.plot.box()
    fig.update_layout(template='simple_white', margin=dict(l=4, r=4, t=4, b=4, pad=4, autoexpand=True))
    fig.update_layout(height=150, width=180)
    fig.update_layout(xaxis_title=None, yaxis_title=None)
    fig.update_yaxes(range=[-130, -10], dtick=40, minor=dict(ticklen=3, nticks=2))
    fig.write_image(f"graphs/mpe_{algo}_box.pdf")
    fig.show("svg")
```

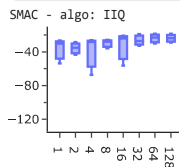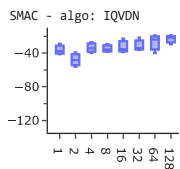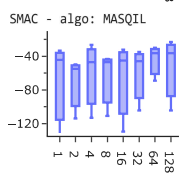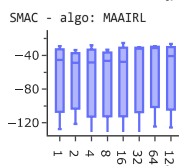

SMAC - algo: MAGAIL



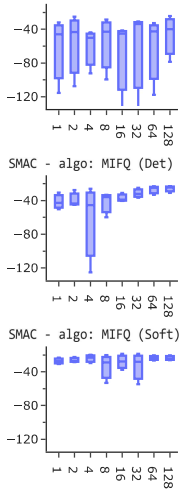

```
In [ ]: plotly_figs = {}
showlegend_dict = {}
for eps in reversed(all_eps):
    for env_name, values in data[f"eps{eps}"].items():
        name = "smac"
        if env_name.startswith("miner"):
            name = "miner"
        elif env_name.startswith("simple"):
            name = "simple"
        if name not in showlegend_dict:
            showlegend_dict[name] = {}
        if eps not in plotly_figs:
            plotly_figs[eps] = {}
        plotly_figs[eps][env_name] = create_baseline_fig(values, showlegend_dict[name], extra_activation=True)
```

```
In [ ]: fig = show_smac(4096, "_extend")
fig.write_image(f"graphs/legend_smac_extend.pdf")
```

Number of expert episodes: 4096

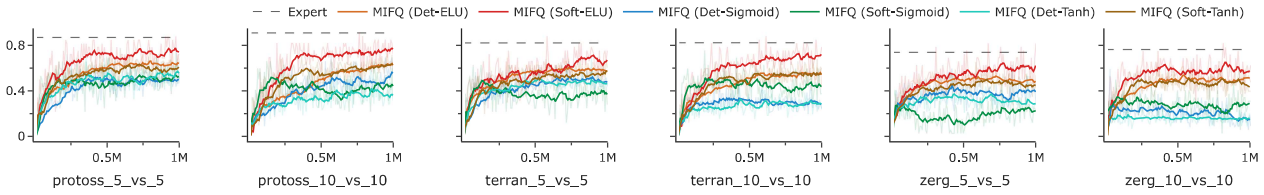

```
In [ ]: fig = show_miner(4096, "_extend")
fig.write_image(f"graphs/legend_miner_extend.pdf")
```

Number of expert episodes: 4096

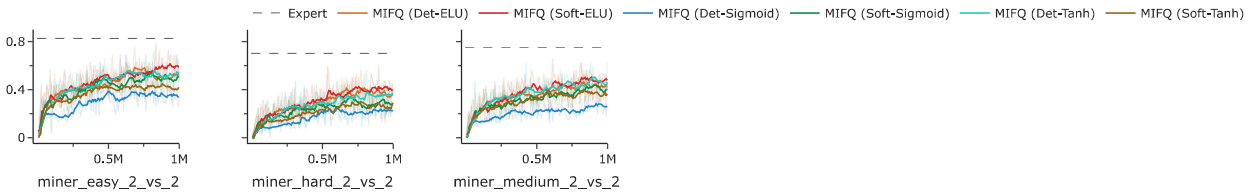

Supplement: supplementary_material [file attachment]
