# Supplementary material
Source: ML conference proceedings conference paper supplement (https://openreview.net/forum?id=xrbgXJomJp)
Supplement: supplementary_material [file attachment]

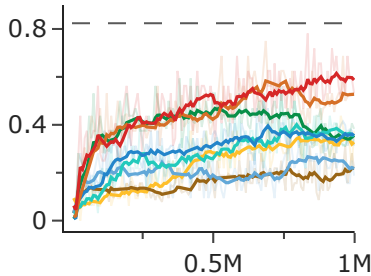

miner\_easy\_2\_vs\_2

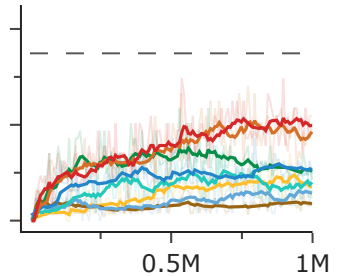

miner\_hard\_2\_vs\_2

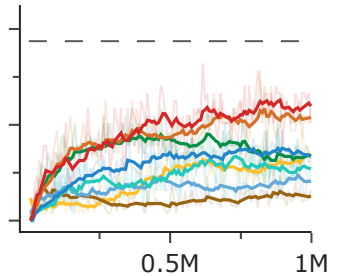

miner\_medium\_2\_vs\_2

— Expert — BC — IIQ — IQVDN — MASQIL — MAAIRL — MAGAIL — MIFQ (Det) — MIFQ (Soft)
